# Supplementary material
Source: Springer Nature journal article supplement (https://www.springermedizin.de/resource/supplementary/12888_2011_848_MOESM1_ESM.doc/9478358)
Supplement: MOESM1 [file 9478358]

**Figures**
